# Supplementary material for: In-Situ Synthesis of Heterostructured Carbon-Coated Co/MnO Nanowire Arrays for High-Performance Anodes in Asymmetric Supercapacitors
Source: MDPI journal article supplement (doi:10.3390/molecules25143218), 2020-07-15
Supplement: s1 [file s1]

**Supporting Information**

**In-Situ Synthesis of Heterostructured Carbon-Coated  
Co/MnO Nanowire Arrays for High-Performance Anodes in  
Asymmetric Supercapacitors**

Guoqing Chen,<sup>a</sup> Xuming Zhang,<sup>a\*</sup> Yuanhang Ma,<sup>a</sup> Hao Song,<sup>a,b</sup> Chaoran Pi,<sup>a</sup> Yang  
Zheng,<sup>a\*</sup> Biao Gao,<sup>a,b</sup> Jijiang Fu,<sup>a</sup> and Paul K Chu<sup>b\*</sup>

<sup>a</sup> The State Key Laboratory of Refractories and Metallurgy, Institute of Advanced Materials and Nanotechnology, Wuhan University of Science and Technology, Wuhan 430081, China.

<sup>b</sup> Department of Physics, Department of Materials Science & Engineering, and Department of Biomedical Engineering, City University of Hong Kong, Tat Chee Avenue, Kowloon, Hong Kong, China

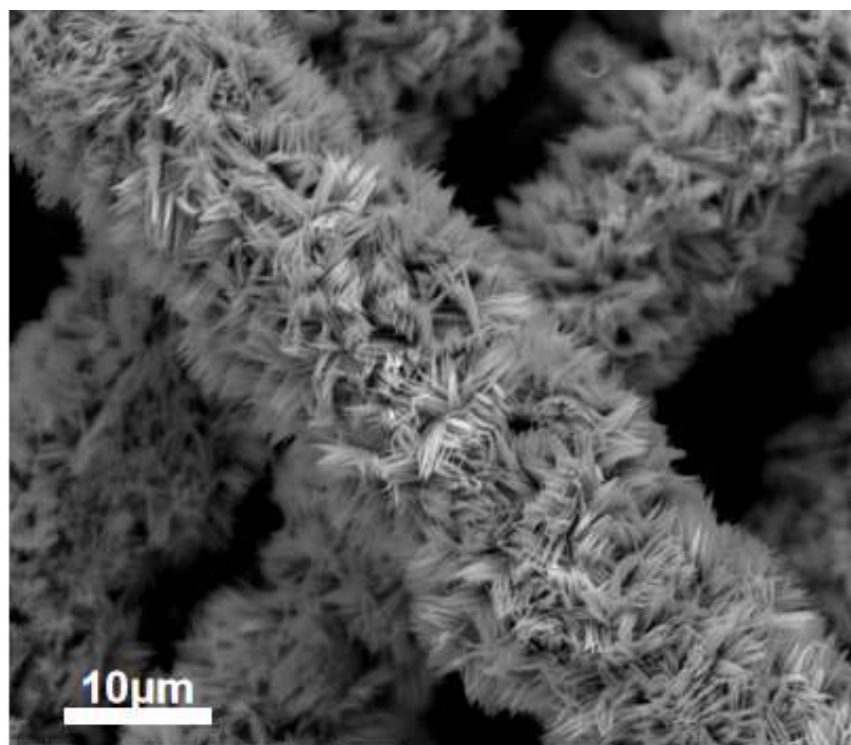

**Figure S1.** SEM image of MnCo<sub>2</sub>O<sub>4.5</sub>-Ar(600).

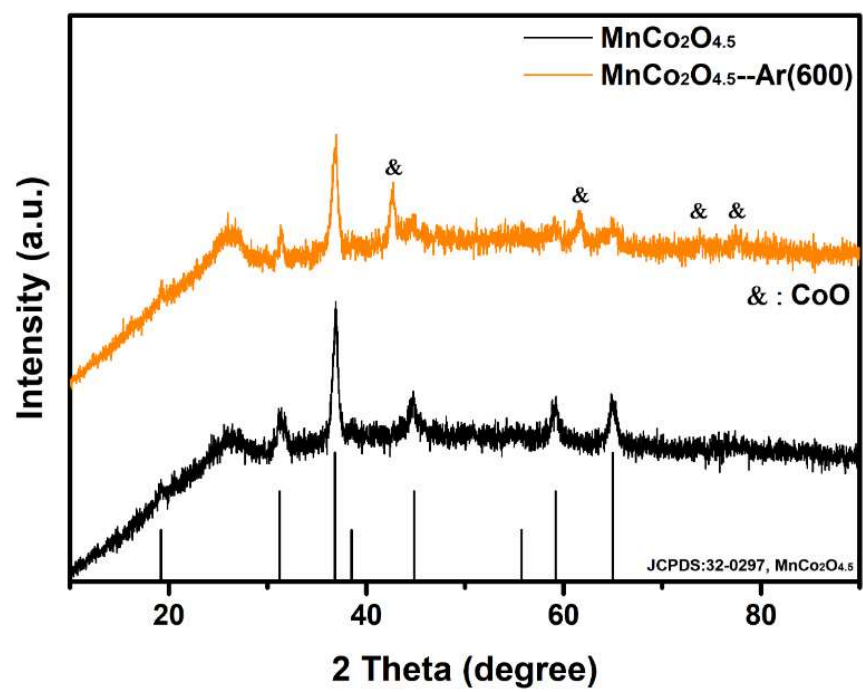

**Figure S2.** XRD patterns of the pristine  $\text{MnCo}_2\text{O}_{4.5}$  and  $\text{MnCo}_2\text{O}_{4.5}\text{-Ar(600)}$ .

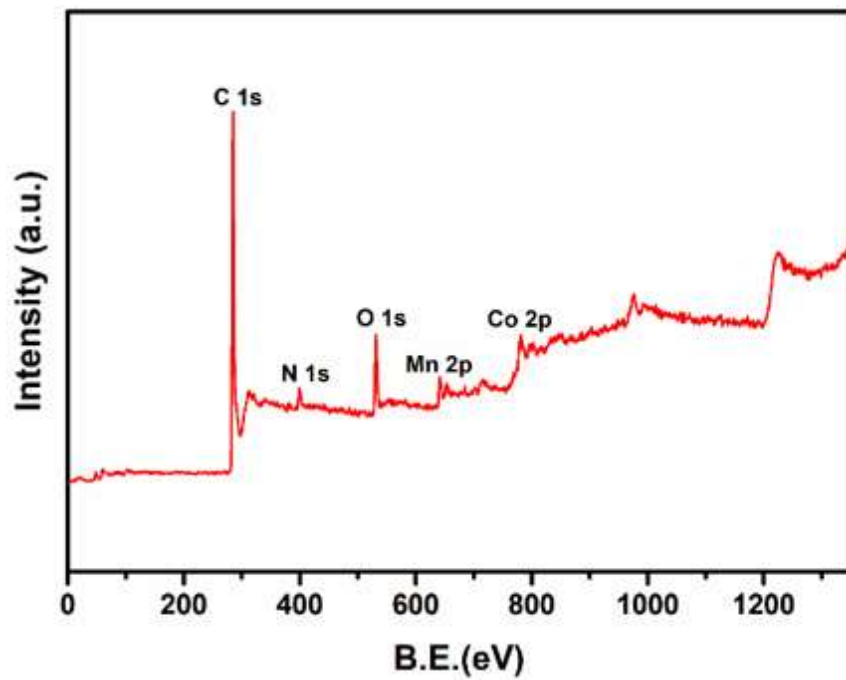

**Figure S3.** Survey scanning XPS spectra of the S-600.

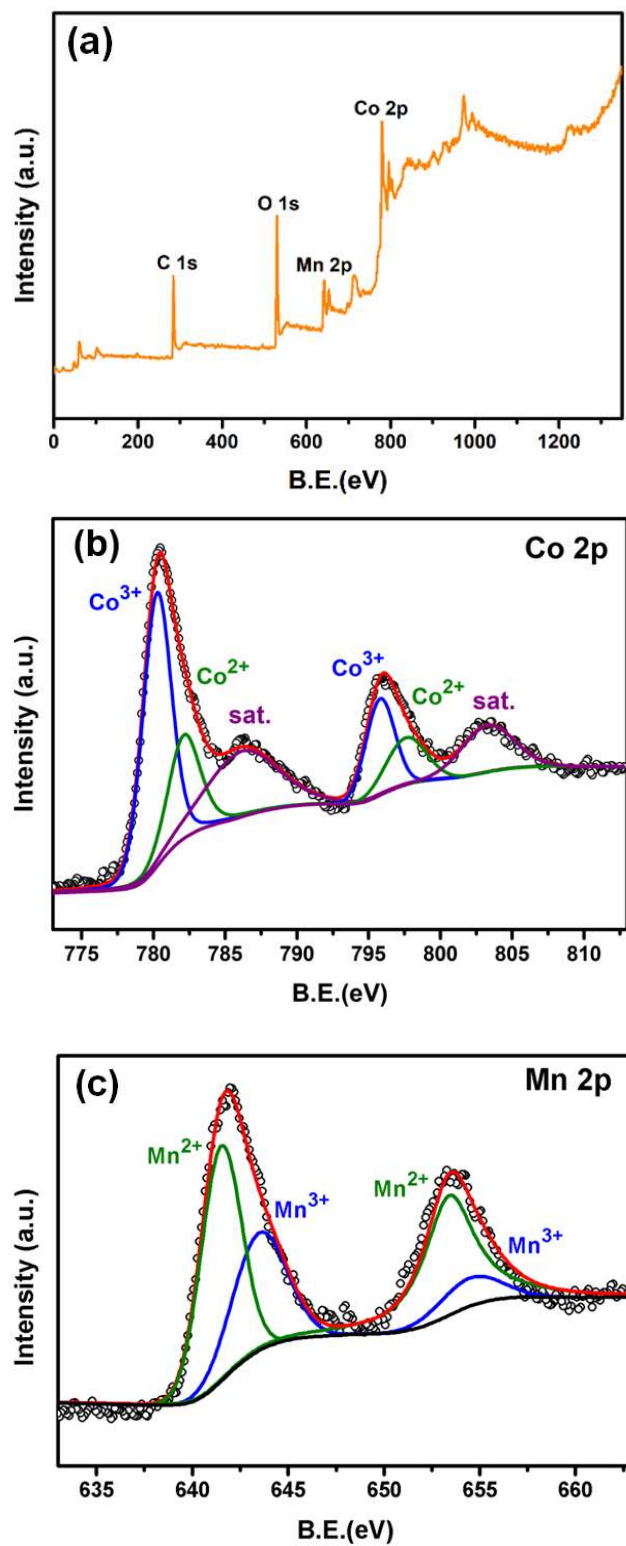

**Figure S4.** (a) Survey scanning XPS spectra of the  $\text{MnCo}_2\text{O}_{4.5}\text{-Ar(600)}$ , (b) and (c)

Corresponding high resolution Co 2p and Mn 2p.

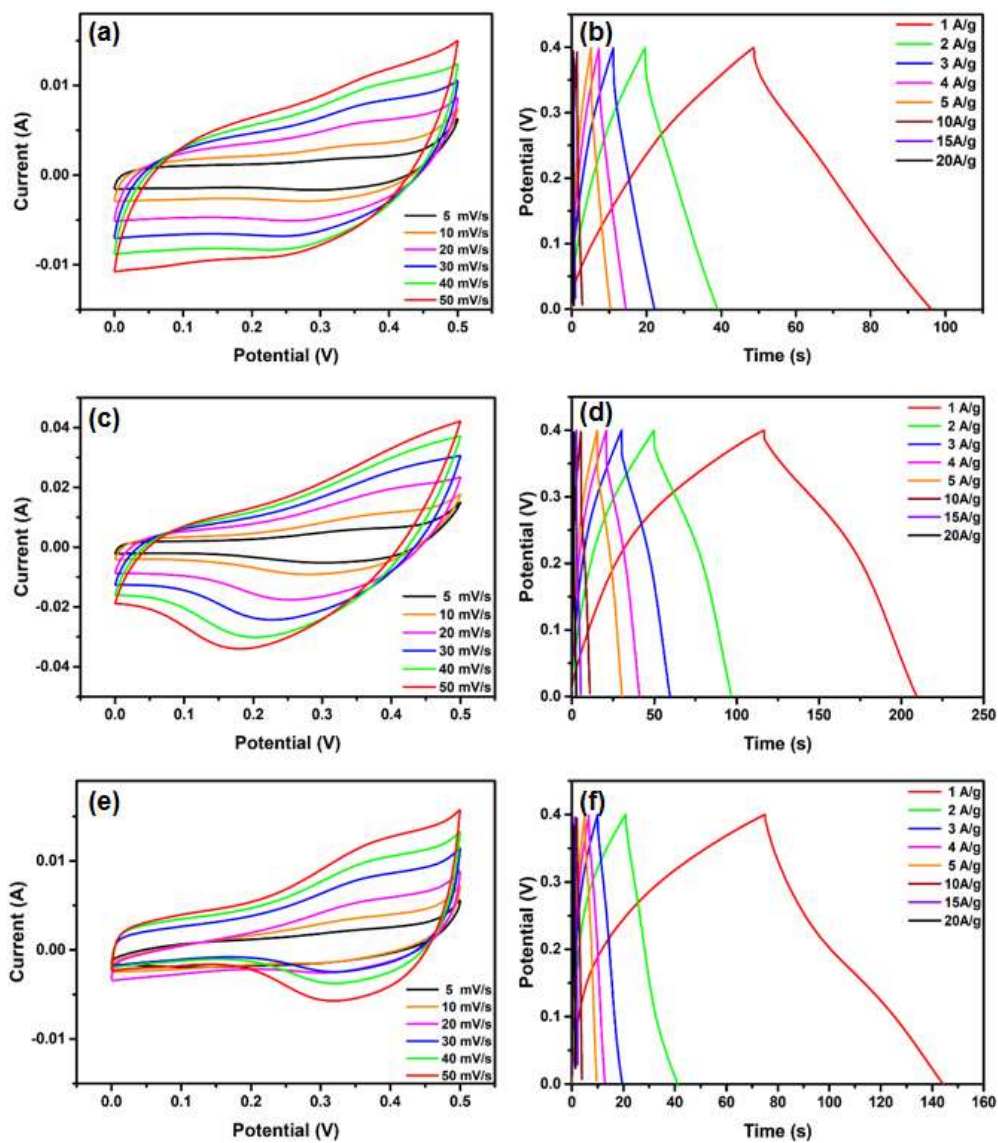

**Figure S5.** CV and GCD curves of (a-b) pristine MnCo<sub>2</sub>O<sub>4.5</sub> NWs, (c-d) S-500 and (e-f)

S-700.

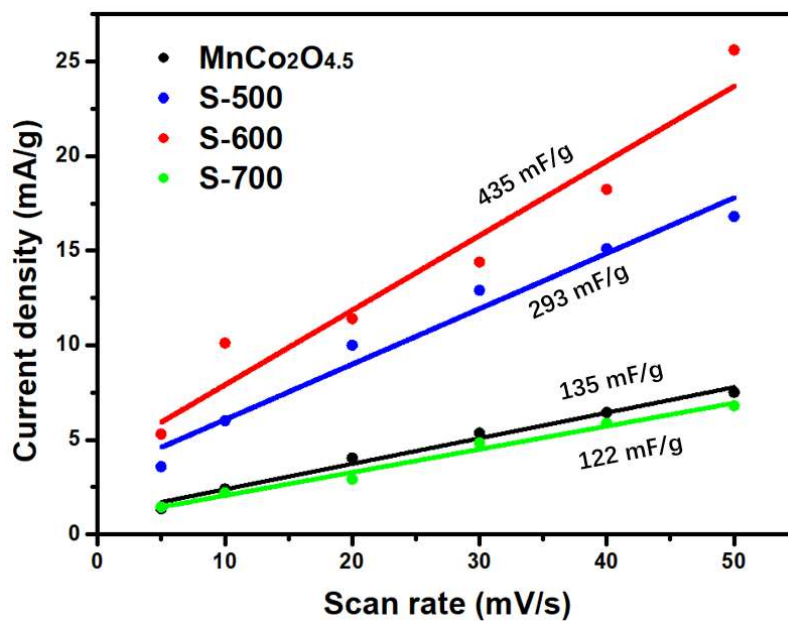

**Figure S6.** Current densities obtained from CV curves as a function of scanning rates, the corresponding slope being the  $C_{dl}$  values.

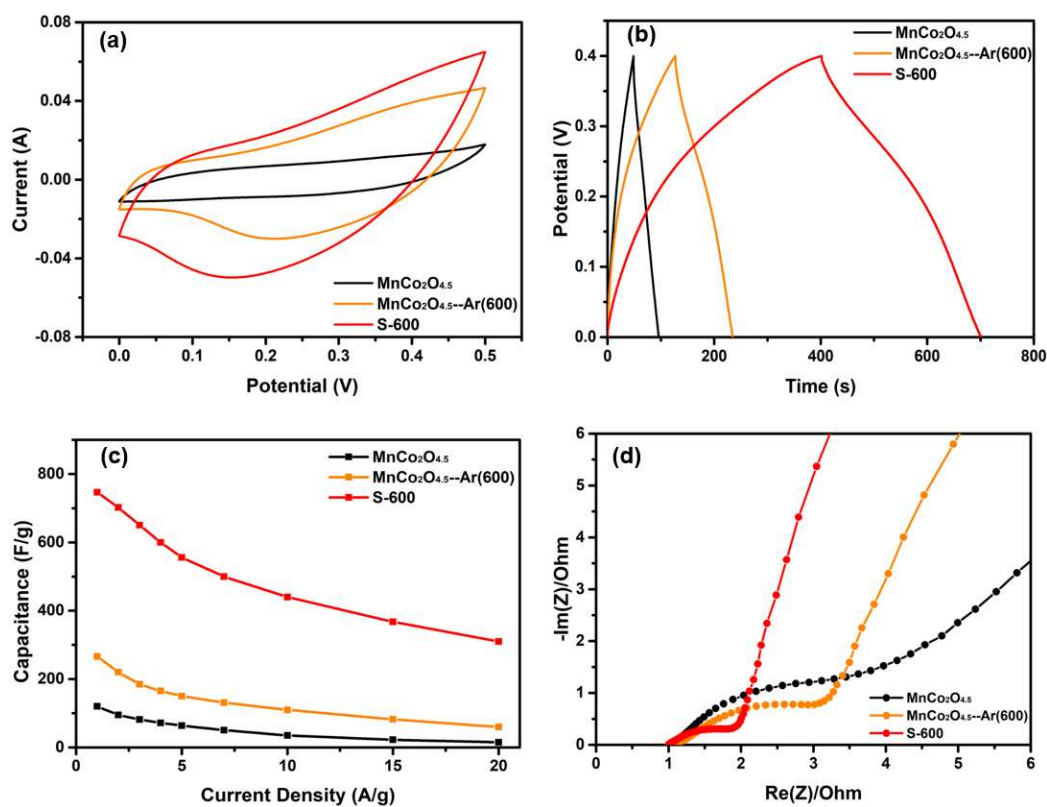

**Figure S7.** Electrochemical performance:(a) CV curves of  $\text{MnCo}_2\text{O}_{4.5}$ ,  $\text{MnCo}_2\text{O}_{4.5}\text{-Ar(600)}$  and S-600 at a scanning rate of  $50 \text{ mV s}^{-1}$ ; (b) GCD curves at  $1 \text{ A g}^{-1}$ ; (c) Specific capacitances;(d) Nyquist plots



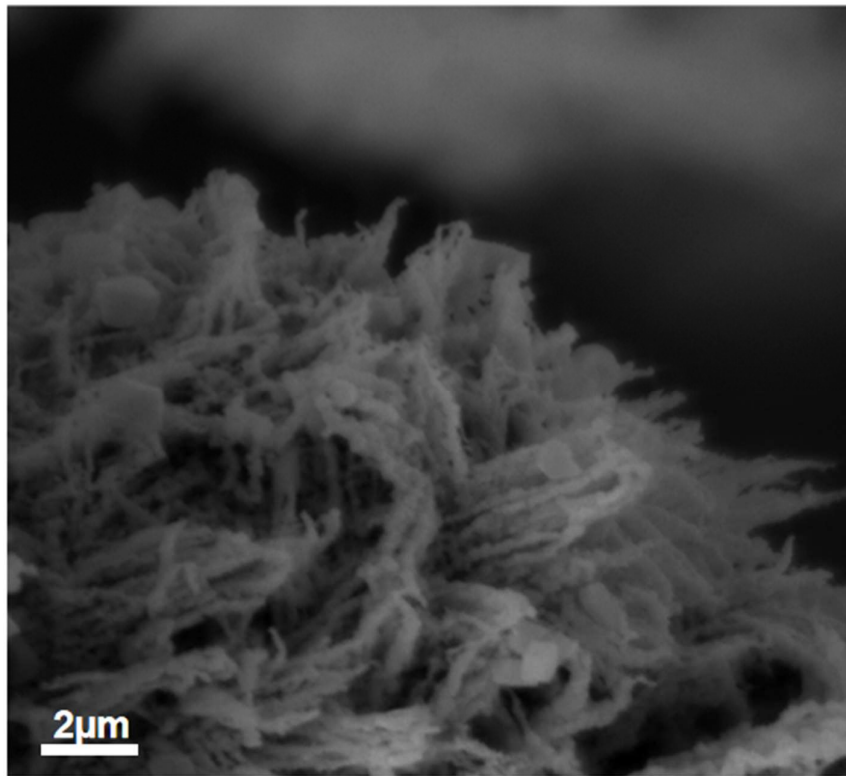

**Figure S8.** SEM image of S-600 NWs after 5000 cycles.

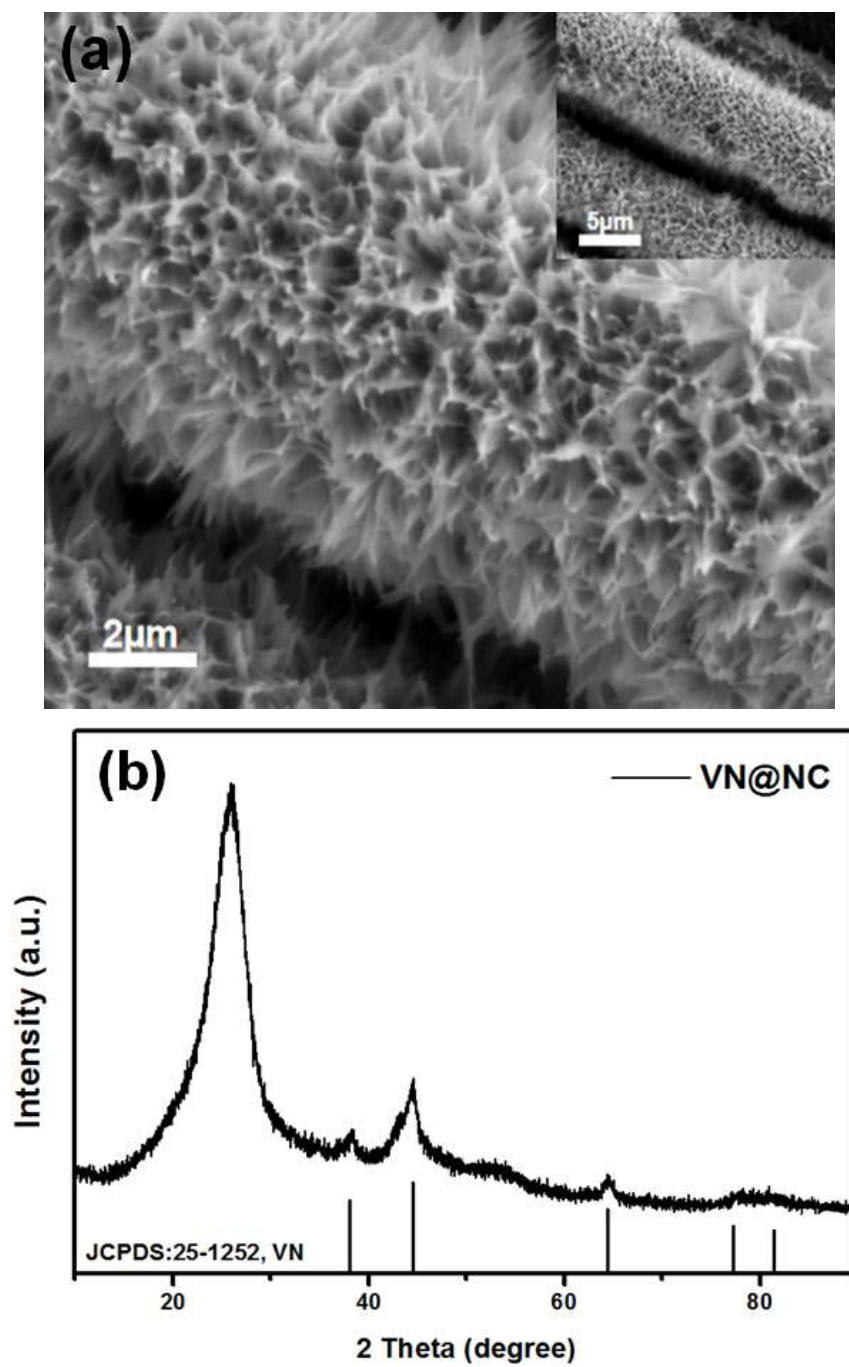

**Figure S9.** (a) SEM image of VN@NC; (b) Corresponding XRD pattern.

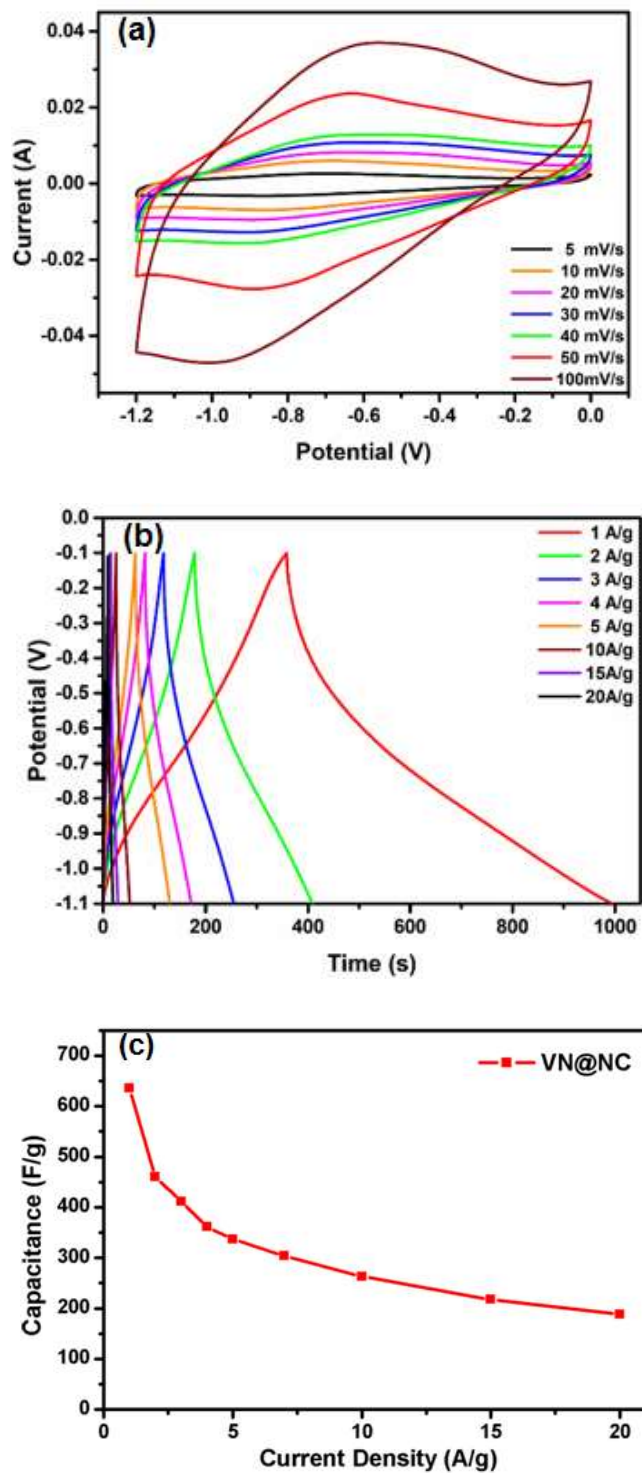

**Figure S10.** Electrochemical performance of VN@NC NWs electrode, (a) CV curves, (b) GCD curves, (c) Corresponding specific capacitances as function of discharging density.
